# Supplementary material
Source: PubMed Central journal article supplement (PMC5123683)
Supplement: NIHMS817966-supplement-Supplemental_Material.pdf [file NIHMS817966-supplement-Supplemental_Material.pdf]

**SUPPLEMENTAL MATERIAL**

**Supplemental Figure 1.** Competing Risk Plots of Waitlist Events for the (A) bottom SES quartile, (B) second SES quartile, (C) third SES quartile, and (D) top SES quartile while on LVAD support

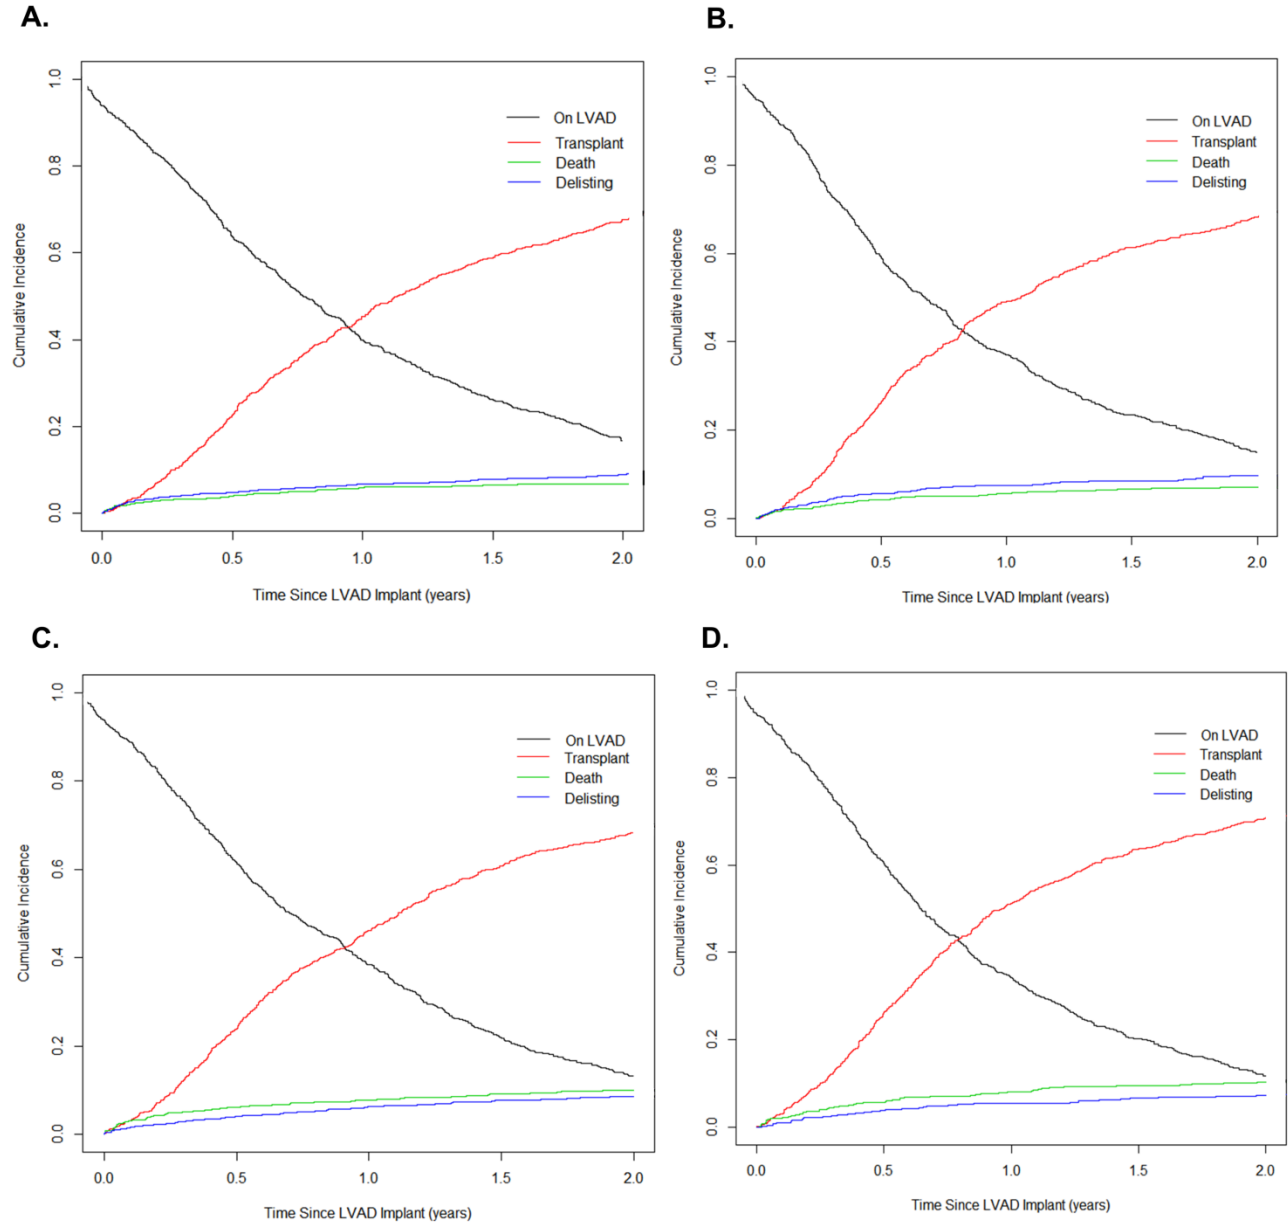



### **Supplemental Table 1. Socioeconomic Index Score Calculation**

$$\text{SES Index Score} = 50 + (-0.07 * \text{crowded}) + (0.08 * \text{prop100}) + (-0.10 * \text{pct\_poverty}) \\ + (0.11 * \text{hhinc100}) + (0.10 * \text{high\_educ}) + (-0.11 * \text{low\_educ}) + (-0.08 * \text{pct\_unemp})$$

Abbreviations:

- crowded = Percentage of households containing one or more person per room
- prop100 = Median value of owner-occupied values, standardized to range from 0-100
- pct\_poverty = Percentage of persons below the federally defined poverty line
- hhinc100 = Median household income, standardized to range from 0-100
- high\_educ = Percentage of persons aged  $\geq 25$  years with at least 4 years of college
- low\_educ = Percentage of persons aged  $\geq 25$  years with less than a 12th-grade education
- pct\_unemp = Percentage of persons aged 16 years or older in the labor force who are unemployed (and actively seeking work)
